# Supplementary material for: Electrochemical detection of oxacillin resistance with SimpleStat: a low cost integrated potentiostat and sensor platform
Source: Royal Society of Chemistry journal article supplement (doi:10.1039/c9ay00383e), 2019-01-01
Supplement: c9ay00383e1.zip [file c9ay00383e1.zip]

## Sheet: Calibration Procedure
CALIBRATION PROCEDURE
THEORITICAL CURRENT RANGES CALCULATED FROM ON BOARD TIA RESISTORS
Vref:	2.5	Volts
	Current Range up to (A):	Test Resistance (Ohms)	Max V_out (V)	TIA Resistor (Ohms)
	3.59195e-06	348000	1.25	348000
	1.04167e-05	120000	1.25	120000
	1.84366e-05	67800	1.25	67800
Battery Potential:		Volts
Potential after SAM layer measurements:		Volts
Potential after binding measurements:		Volts
STEP 1: Define Test Resistor and Feedback Resistor
Test Resistor (acutal):	99600	Ohms
Rtia:	120000	Ohms
STEP 3: TRIM BOTH POTS TO VALUE BELOW:
Calibration Point 1 (J2 Pin 3):	1.25	Volts
Calibration Point 2 (J3 Pin 1):	1.25	Volts
STEP 4: RECORD CALIBRATION VALUES BELOW:
Calibration table:	DAC Potential Window	Measured Values (volts)				Theoritical Values:		Actual Values:		Error (A)
		CE-WKG	CE-GND	WKG-GND	Vout-GND	Current	Vout	Current
DAC REF POS	68					0	1.25	-1.04167e-05		1.04167e-05
DAC 127	127					0	1.25	-1.04167e-05		1.04167e-05
DAC REF NEG	184					0	1.25	-1.04167e-05		1.04167e-05
