# Supplementary figures and images for: Electrochemical detection of oxacillin resistance with SimpleStat: a low cost integrated potentiostat and sensor platform
Source: Royal Society of Chemistry journal article supplement (doi:10.1039/c9ay00383e), 2019-01-01

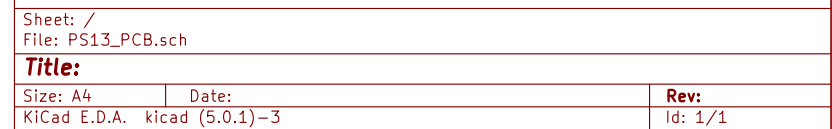

Supplement: c9ay00383e1.zip [file c9ay00383e1.zip]
